# Supplementary material for: Synthesis of facial cyclometalated iridium(iii) complexes triggered by tripodal ligands
Source: Royal Society of Chemistry journal article supplement (doi:10.1039/c2dt12309f), 2012-01-01
Supplement: c2dt12309f.pdf [file c2dt12309f.pdf]

## Supplementary Information for

### Synthesis of Facial Cyclometalated Iridium(III) Complexes Triggered by Tripodal Ligands

Toshiyuki Moriuchi,<sup>\*a</sup> Lisheng Mao,<sup>a,b</sup> Hsyueh-Liang Wu,<sup>a,c</sup> Satoshi D. Ohmura,<sup>a</sup>  
Masami Watanabe,<sup>d</sup> and Toshikazu Hirao<sup>\*a</sup>

<sup>a</sup> *Department of Applied Chemistry, Graduate School of Engineering, Osaka University, Yamada-oka, Suita, Osaka 565-0871, Japan*

<sup>b</sup> *Shanghai Institute of Organic Chemistry, Chinese Academy of Sciences, 345 Lingling Road, Shanghai 200032, China*

<sup>c</sup> *Current address: Department of Chemistry, National Taiwan Normal University, NO. 88, Sec. 4, Tingzhou Rd. Taipei 116, Taiwan, R.O.C.*

<sup>d</sup> *Idemitsu Kosan Co.,Ltd., Kamiizumi, Sodegaura, Chiba 299-0293, Japan*  
*moriuchi@chem.eng.osaka-u.ac.jp, hirao@chem.eng.osaka-u.ac.jp*

### Proton Magnetic Resonance Nuclear Overhauser Effect Measurements.

A sample was prepared under argon. Nuclear Overhauser effect experiments were performed with 2 second irradiation of a freeze-pump-thaw degassed CD<sub>2</sub>Cl<sub>2</sub> solution of **2c**. The 400 MHz <sup>1</sup>H NMR spectra were recorded at 25 °C. Nuclear Overhauser enhancements were obtained by saturation of the desired resonance. Irradiation of the cyclohexyl proton at the 1-position showed no enhancement of the cyclohexyl equatorial proton at the 2-position (Figure S1). Irradiation of the cyclohexyl axial proton at the 2-position enhanced the pyridyl proton at the 6-position (Figure S2).

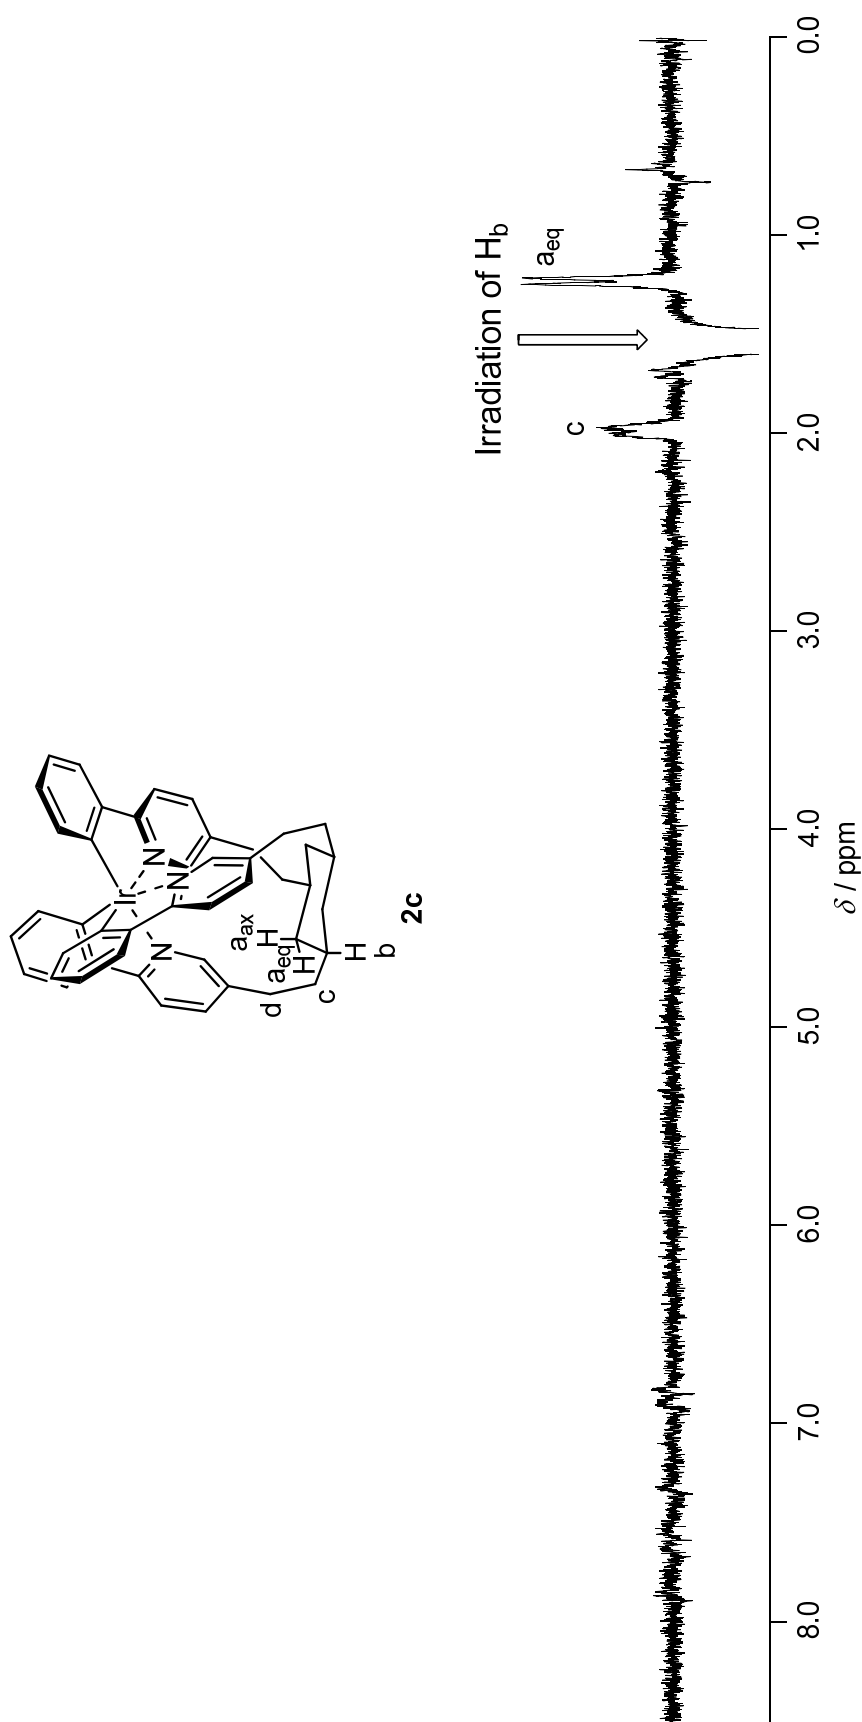

**Figure S1.** 400 MHz <sup>1</sup>H NMR difference NOE experiment performed at 25 °C with 2 second irradiation of a freeze-pump-thaw degassed solution of **2c** in CD<sub>2</sub>Cl<sub>2</sub>.

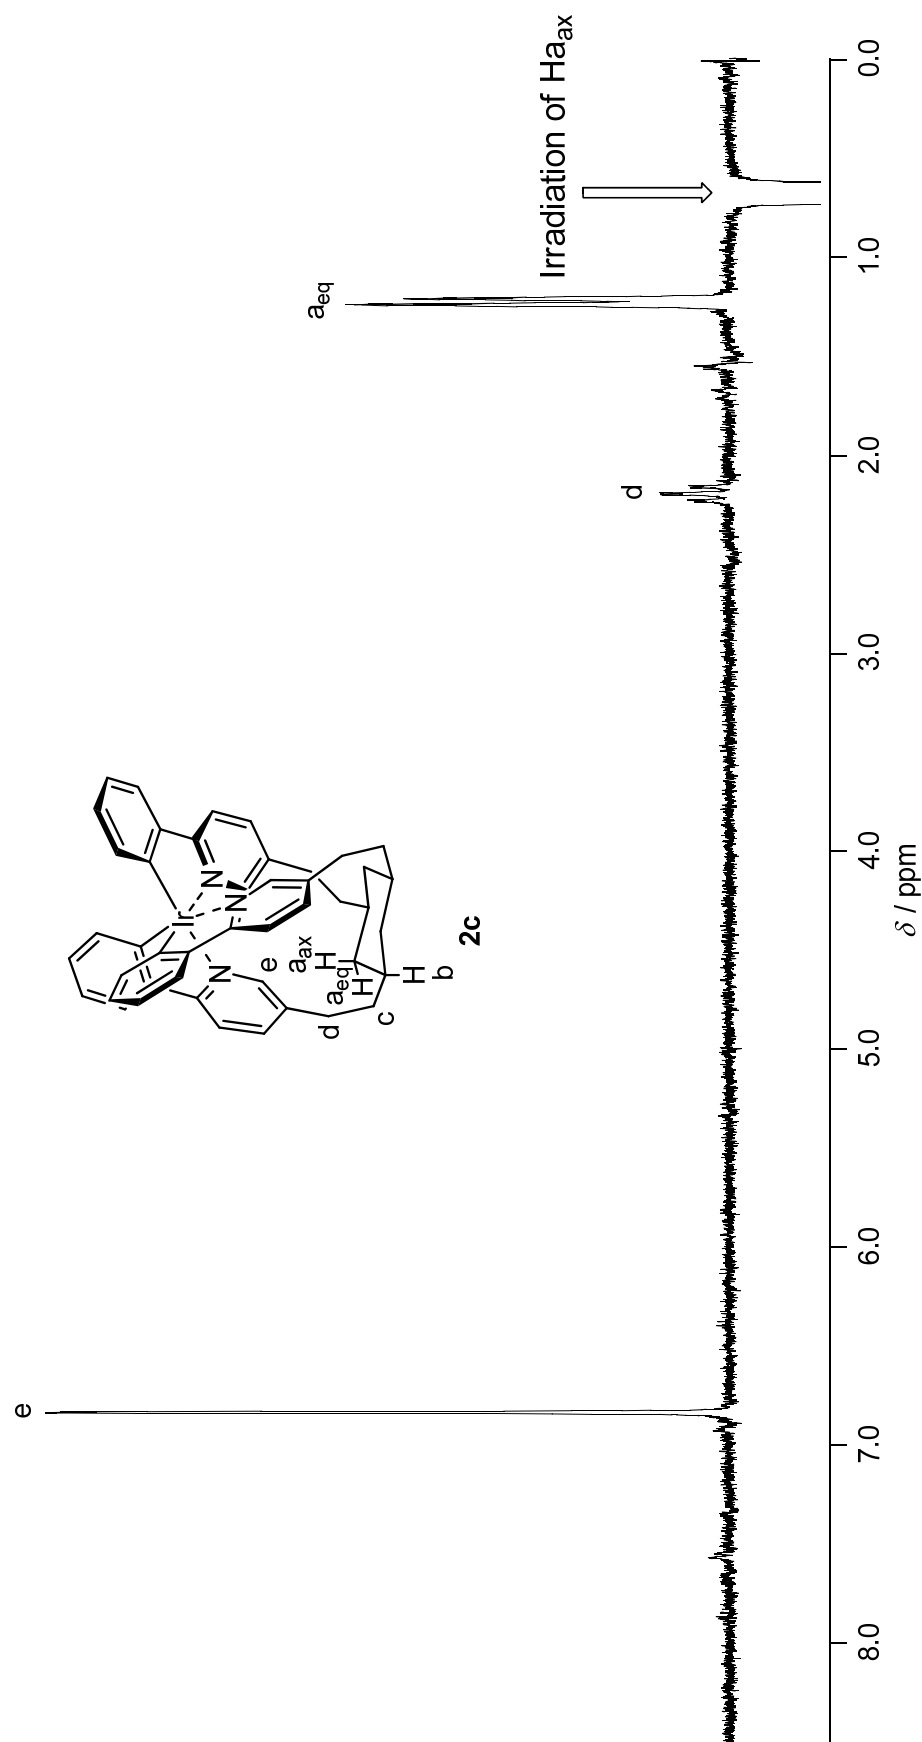

**Figure S2.** 400 MHz <sup>1</sup>H NMR difference NOE experiment performed at 25 °C with 2 second irradiation of a freeze-pump-thaw degassed solution of **2c** in CD<sub>2</sub>Cl<sub>2</sub>.
